# Supplementary material
Source: Royal Society of Chemistry journal article supplement (doi:10.1039/d5fd00122f)
Supplement: d5fd00122f1.pdf [file d5fd00122f1.pdf]

## Supplementary Information

**Correlating binding energies of adsorbed CO and H on model surfaces with CO/H<sub>2</sub> selectivity from  
co-electrolysis of CO<sub>2</sub> and H<sub>2</sub>O over copper-palladium bimetallic catalysts**

**Marcus Yu<sup>a,1</sup>, Hong Zhang<sup>b,1</sup>, William J. Wei<sup>a</sup>, Ping Liu<sup>b</sup>, Jingguang G. Chen<sup>a,b,\*</sup>**

Author Affiliations:

<sup>a</sup>Department of Chemical Engineering, Columbia University, New York, NY, 10027, USA

<sup>b</sup>Chemistry Division, Brookhaven National Laboratory, Upton, NY, 11973, USA

\* Corresponding author: [jgchen@columbia.edu](mailto:jgchen@columbia.edu) (J.G.C)

<sup>1</sup> These authors contributed equally.

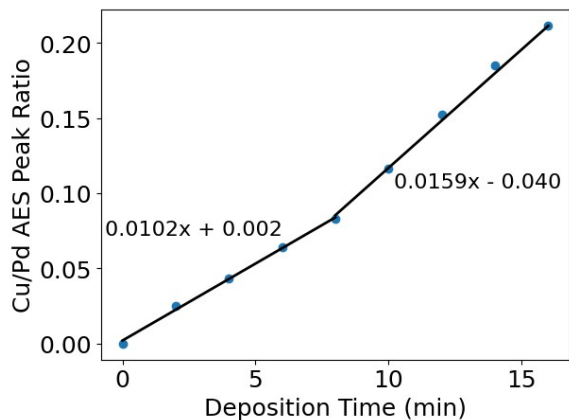

**Figure S1.** AES peak ratios for Cu (920 eV)/Pd(270 eV) as a function of deposition time. After 8 minutes, a change in the slope indicated the formation of 1 ML of Cu on the Pd(111) surface.

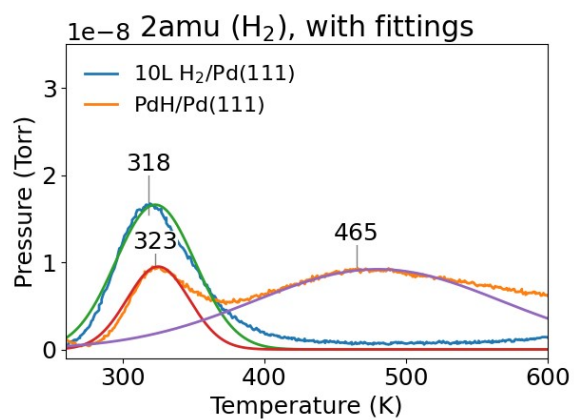

**Figure S2.** Gaussian fitting overlaid over the H<sub>2</sub> TPD spectra from Pd(111) and PdH/Pd(111).

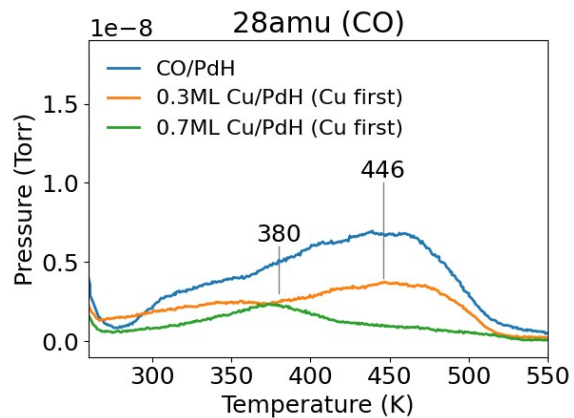

**Figure S3.** TPD spectra of CO desorption from Cu/Pd(111) surfaces that had Cu deposited first and then was subsequently treated with 600L  $H_2$  to form a bulk Cu/PdH phase.

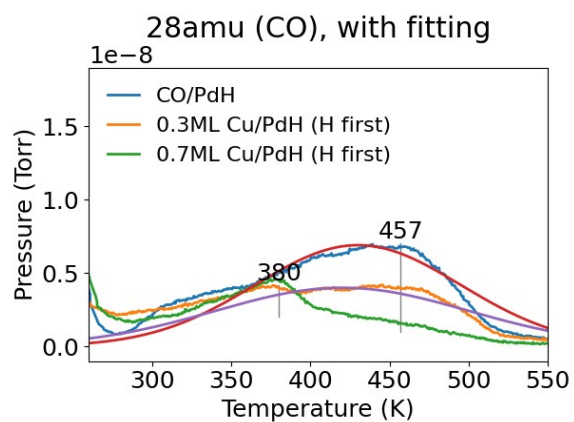

**Figure S4.** Gaussian fitting overlaid over the CO TPD spectra from Cu/Pd(111) and Cu/PdH surfaces.

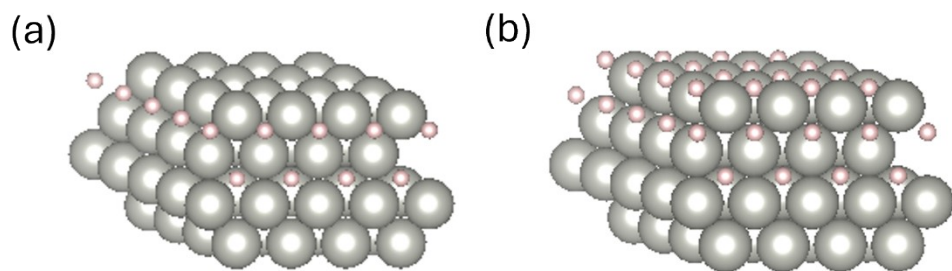

**Figure S5.** (a) Pd-terminated PdH(111) and (b) H-terminated PdH(111). (Grey: Pd; Pink: H)

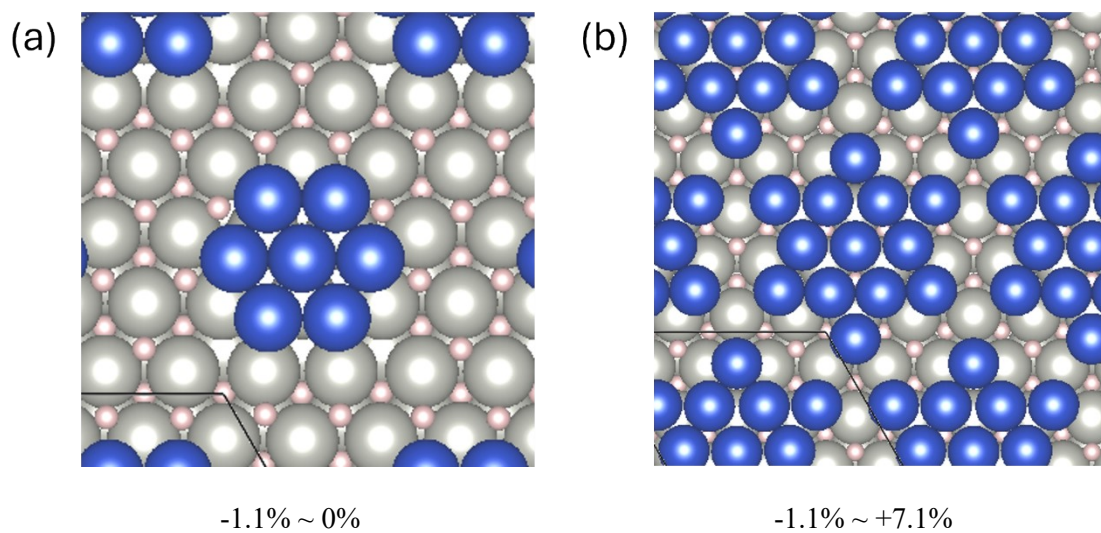

**Figure S6.** Determination of (a) 0.3ML Cu/PdH and (b) 0.7ML Cu/PdH structure with lowest energy and Cu-Cu bond strain range. (Grey: Pd; Blue: Cu; Pink: H)

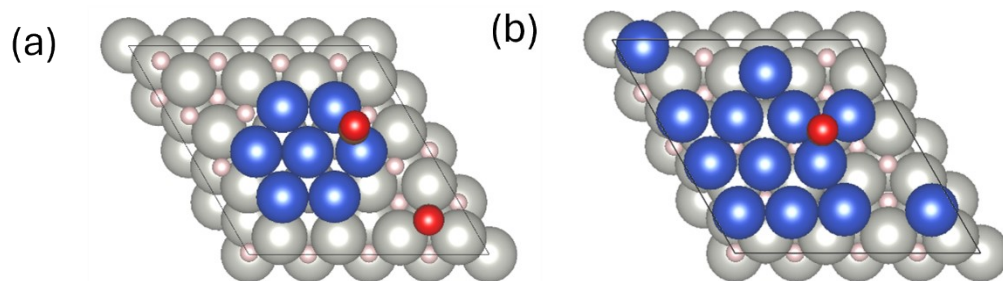

**Figure S7.** Most stable CO binding site on (a) 0.3ML Cu/PdH (Cu site B.E. = -1.10eV, Pd site B.E. = -1.27eV); (b) 0.7ML Cu/PdH (-1.17eV). (Grey: Pd; Blue: Cu; Pink: H; Red: CO)
